# Supplementary material for: Assessment of Bilge Water Degradation by Isolated Citrobacter sp. and Two Indigenous Strains and Identification of Organic Content by GC-MS
Source: MDPI journal article supplement (doi:10.3390/w14091350), 2022-04-21
Supplement: s1 [file s1]

**Assessment of bilge water degradation by isolated *Citrobacter sp.*  
and two indigenous strains and identification of organic content  
by GC-MS**

**Georgia Gatidou\*, Efi-Maria Drakou, Ioannis Vyrides**

Laboratory of Environmental Engineering, Department of Chemical Engineering,  
Cyprus University of Technology, Anexartisias 57 Str., Lemesos, 3603, Cyprus

- A. Supplementary Tables**
- B. Supplementary Figures**
- C. DNA analysis data**
- D. References**

## A. Supplementary Tables

**Table S1.** Physicochemical properties of real bilge water before treatment.

| Physicochemical Parameters | Concentration      |
|----------------------------|--------------------|
| TS                         | 908±15 (mg/L)      |
| BOD                        | 4.147 ± 1.05 (g/L) |
| COD                        | 10.684 ± 1.8 (g/L) |
| PO <sub>4</sub>            | 1.09 ± 0.24 (mg/L) |
| NH <sub>4</sub> -N         | 0.62± 0.1 (mg/L)   |
| NO <sub>3</sub> -N         | 0.04± 0.01 (mg/L)  |
| pH: 7.5-8.5                | -                  |

\*Data are obtained from Ecofuel Ltd database.

**Table S2.** Hydrocarbon index of bilge water before treatment.

| Hydrocarbon content            | Concentration (mgL <sup>-1</sup> ) |
|--------------------------------|------------------------------------|
| C6 – C10 (gasoline components) | 0.2                                |
| C11 – C23 (Diesel)             | 0.5                                |
| C24 – C35 (Lubrication oil)    | 0.3                                |

\*Data are obtained from Ecofuel Ltd database.

## B. Supplementary Figures

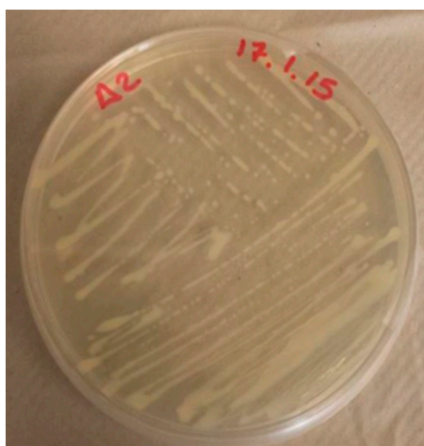

**Figure S1.** Colony formation by *Citrobacter* sp. D2 strain in the presence of phenanthrene ( $150 \text{ mg L}^{-1}$ ).

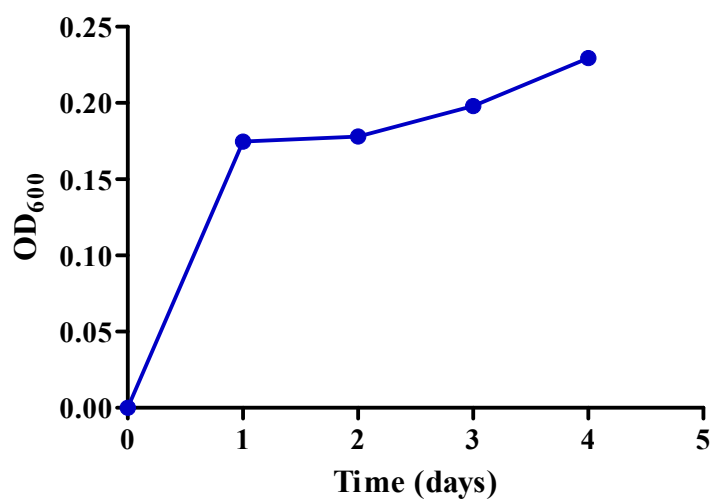

**Figure S2.** Growth curve of *Citrobacter* sp. D2 in MSM medium containing phenanthrene ( $150 \text{ mg L}^{-1}$ ).

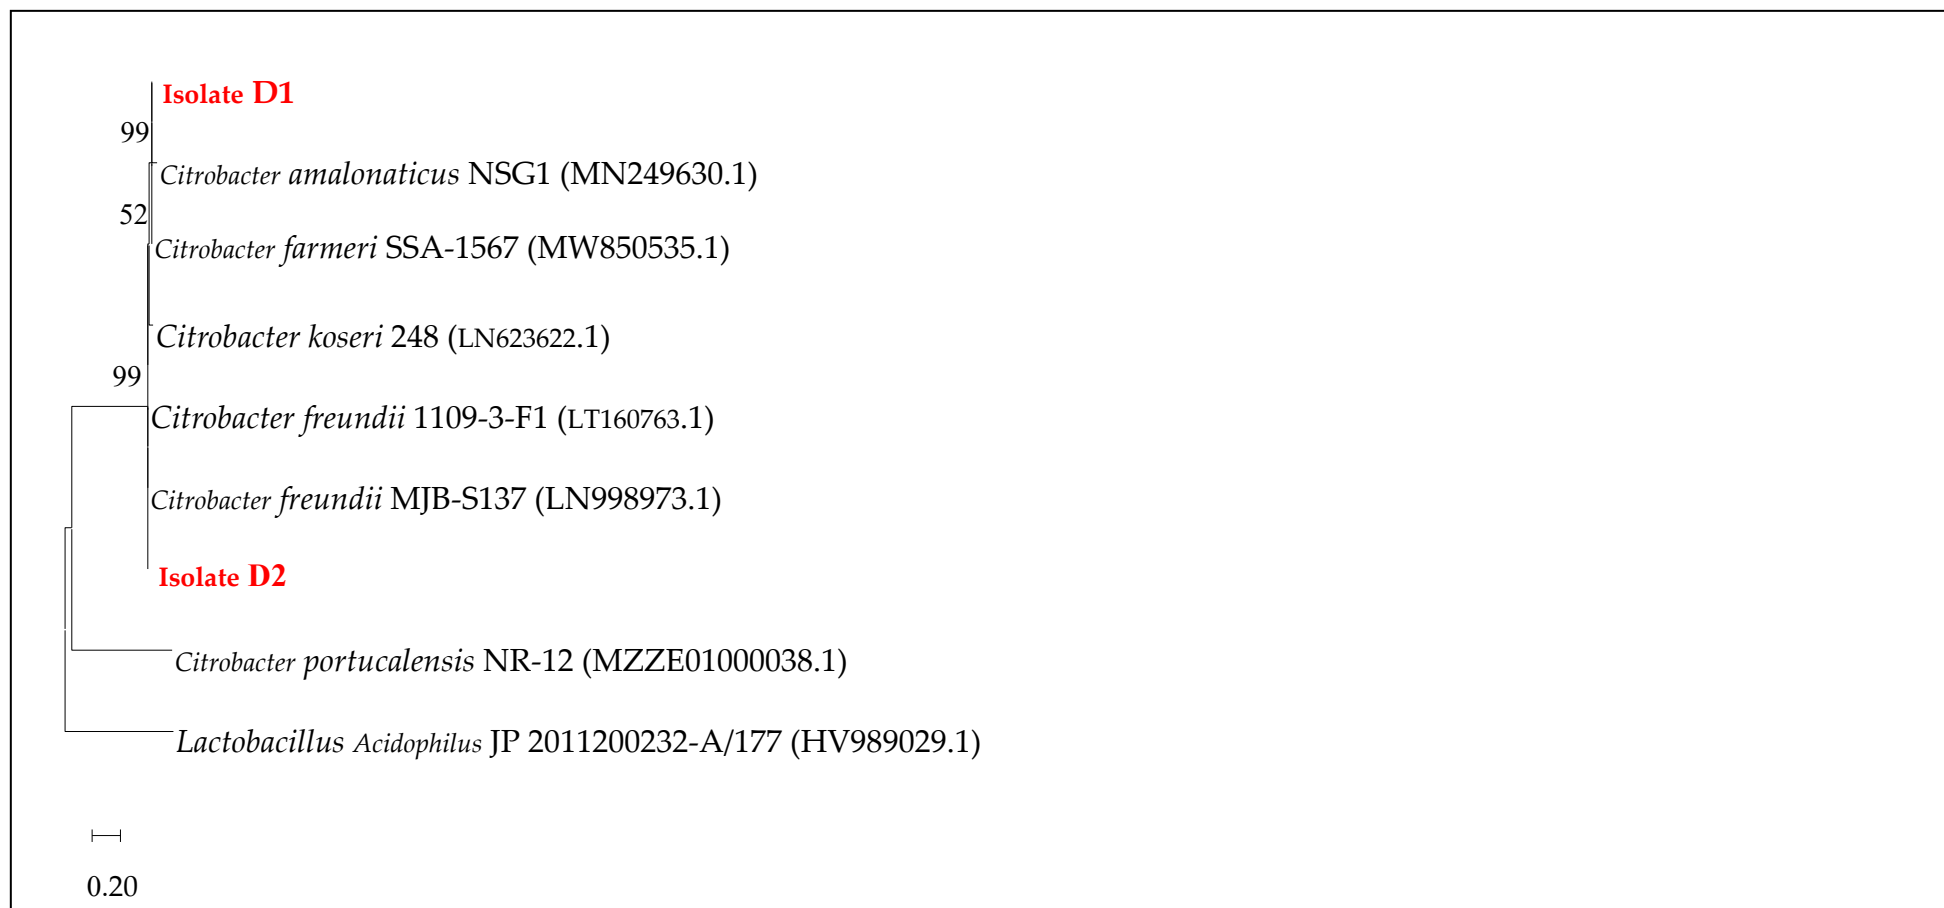

**Figure S3.** Phylogenetic tree diagram for Isolate D1 and D2. The evolutionary history was inferred using the Neighbor-Joining method [42]. The optimal tree is shown. The percentage of replicate trees in which the associated taxa clustered together in the bootstrap test (10000 replicates) are shown next to the branches [43]. The tree is drawn to scale, with branch lengths in the same units as those of the evolutionary distances used to infer the phylogenetic tree. The evolutionary distances were computed using the Maximum Composite Likelihood method [44] and are in the units of the number of base substitutions per site. This analysis involved 9 nucleotide sequences. Codon positions included were 1st+2nd+3rd+Noncoding. All ambiguous positions were removed

for each sequence pair (pairwise deletion option). There were a total of 791 positions in the final dataset. Evolutionary analyses were conducted in MEGA11 [45].

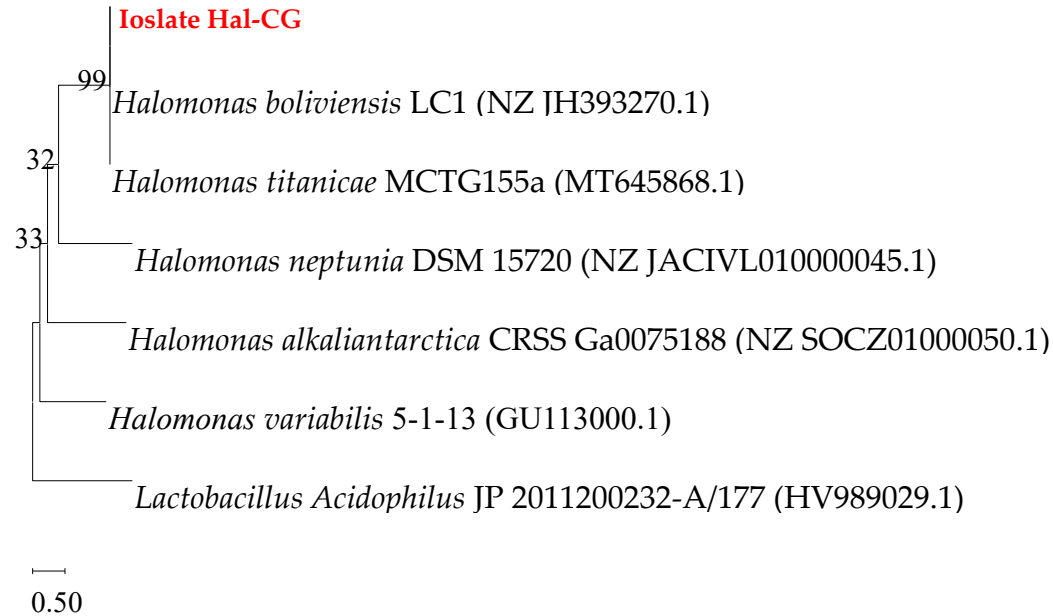

**Figure S4.** Phylogenetic tree diagram for isolate Hal-CG. The evolutionary history was inferred using the Neighbor-Joining method [42]. The optimal tree is shown. The percentage of replicate trees in which the associated taxa clustered together in the bootstrap test (10000 replicates) are shown next to the branches [43]. The tree is drawn to scale, with branch lengths in the same units as those of the evolutionary distances used to infer the phylogenetic tree. The evolutionary distances were computed using the Maximum Composite Likelihood method [44] and are in the units of the number of base substitutions per site. This analysis involved 7 nucleotide sequences. Codon positions included were 1st+2nd+3rd+Noncoding. All ambiguous positions were removed

for each sequence pair (pairwise deletion option). There were a total of 330 positions in the final dataset. Evolutionary analyses were conducted in MEGA11 [45].

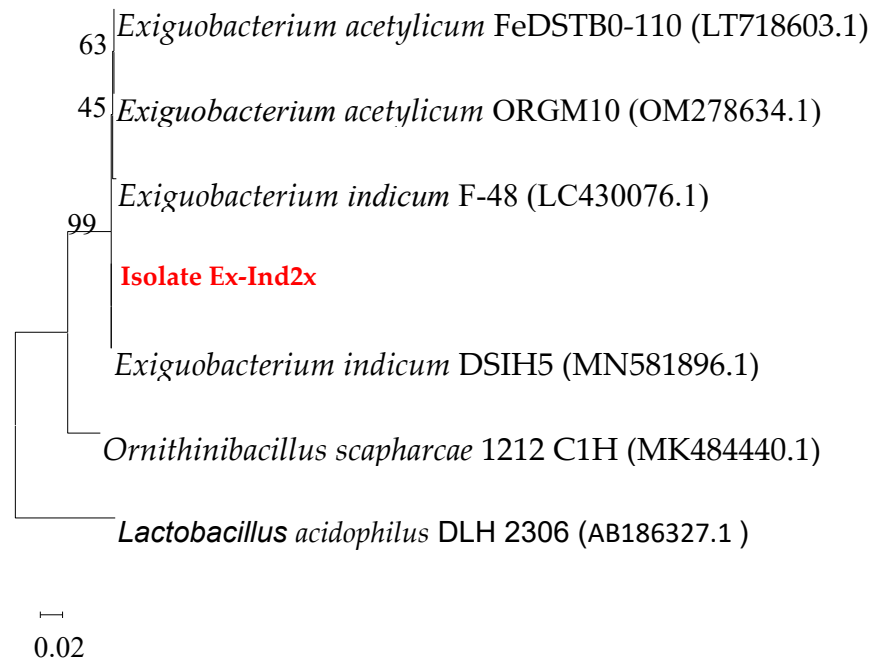

**Figure S5.** Phylogenetic tree diagram for isolate Ex-Ind2. The evolutionary history was inferred using the Neighbor-Joining method [42]. The optimal tree is shown. The percentage of replicate trees in which the associated taxa clustered together in the bootstrap test (10000 replicates) are shown next to the branches [43]. The tree is drawn to scale, with branch lengths in the same units as those of the evolutionary distances used to infer the phylogenetic tree. The evolutionary distances were computed using the Maximum Composite Likelihood method [44] and are in the units of the number of base substitutions per site. This analysis involved 7 nucleotide sequences. Codon positions included were 1st+2nd+3rd+Noncoding. All ambiguous positions were removed for each sequence pair (pairwise deletion option). There were a total of 330 positions in the final dataset. Evolutionary analyses were conducted in MEGA11 [45].

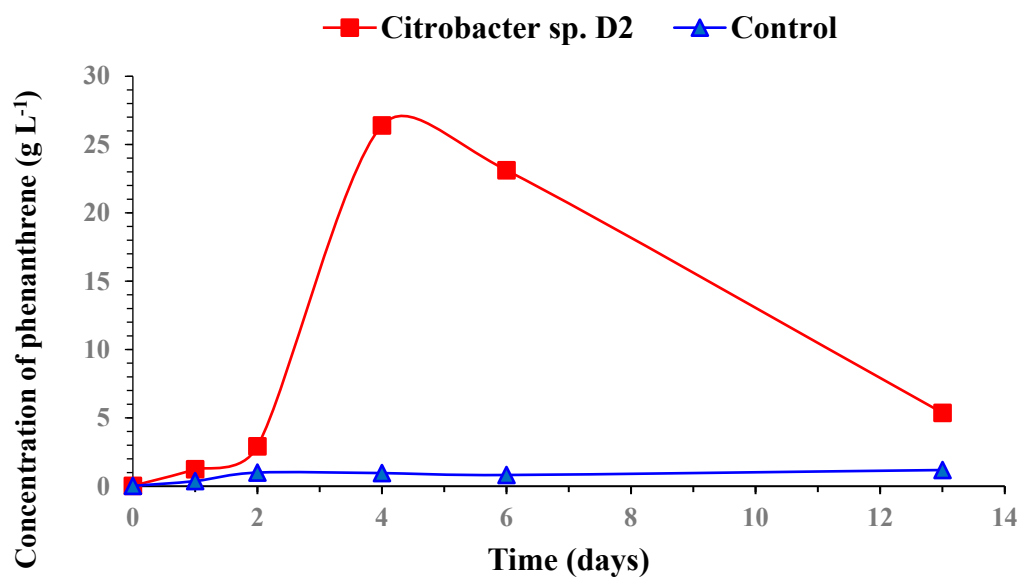

**Figure S6.** Concentration of dissolved phenanthrene during its biodegradation by *Citrobacter* sp. D2.

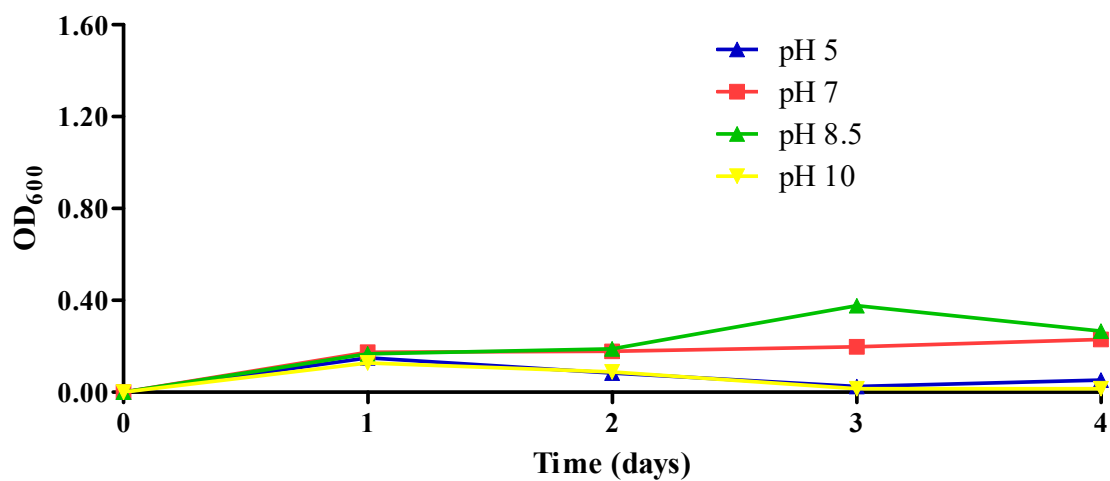

**Figure S7.** Growth of *Citrobacter* sp. D2 under different pH conditions in the presence of phenanthrene (150 mg L<sup>-1</sup>) and NaCl (15 g L<sup>-1</sup>) at 30 °C.



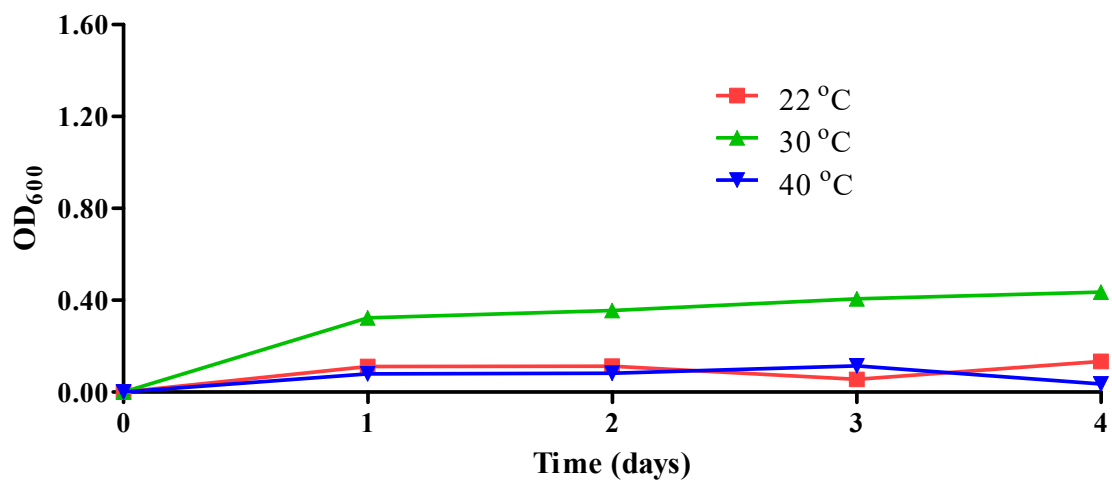

**Figure S8.** Growth of *Citrobacter* sp. D2 under different temperatures in the presence of phenanthrene (150 mg L<sup>-1</sup>) and NaCl (15 g L<sup>-1</sup>).

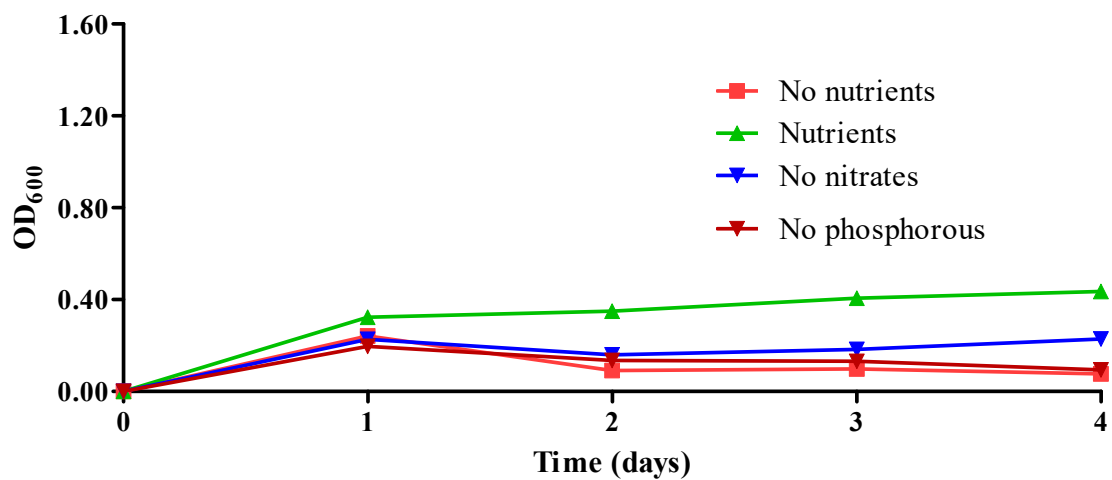

**Figure S9.** Growth of *Citrobacter* sp. D2 under different nutrient conditions in the presence of phenanthrene (150 mg L<sup>-1</sup>) and NaCl (15 g L<sup>-1</sup>).

## C. DNA analysis data

### 1. *Citrobacter* sp. D2

#### Sequence:

CTTGCTCCTTGGGTGACGAGTGGCGGACGGGTGAGTAATGTCTGGGAAACTG  
CCCGATGGAGGGGGATAACTACTGGAAACGGTAGCTAATACCGCATAACGT  
CGCAAGACCAAAGAGGGGGACCTTCGGGCCTCTTGCCATCGGATGTGCCCA  
GATGGGATTAGCTAGTAGGTGGGGTAACGGCTCACCTAGGCGACGATCCCT  
AGCTGGTCTGAGAGGATGACCAGCCACACTGGAAGTGAAGACACGGTCCAGA  
CTCCTACGGGAGGCAGCAGTGGGGAATATTGCACAATGGGCGCAAGCCTGA  
TGCAGCCATGCCGCGTGTATGAAGAAGGCCTTCGGGTTGTAAAGTACTTTCA  
GCGAGGAGGAAGGCGTTGTGGTTAATAACCGCAGCGATTGACGTTACTCGC  
AGAAGAAGCACCGGCTAACTCCGTGCCAGCAGCCGCGGTAATACGGAGGGT  
GCAAGCGTTAATCGGAATTACTGGGCGTAAAGCGCACGCAGGCGGTCTGTC  
AAGTCGGATGTGAAATCCCCGGGCTCAACCTGGGAACTGCATCCGAAACTG  
GCAGGCTAGAGTCTTGTAGAGGGGGGGTAGAATTCCAGGTGTAGCGGTGAA  
ATGCGTAGAGATCTGGAGGAATACCGGTGGCGAAGGCGGCCCCCTGGACAA  
AGACTGACGCTCAGGTGCGAAAGCGTGGGGAGCAAACAGGATTAGATACCC  
TGGTAGTCCACGCCGTAAACGATGTCGACTTGGAGGTTGTGCCCTTGAGGCG  
TGGCTTCCGGAGCTAACGCGTTAAGTCGACCGCCTGGGGAGTACGGCCGCA  
AGGTAAAACTCAAATGAATTGACGGGGGGCCCGCACAAAGCGGTGGAGCATG  
TGGTTTAATTCGATGCAACGCGAAGAACCTTACCTACTCTTGACATCCAGAG  
AACTTAGCAGAGATGCTTTGGTGCCTTCGGGAACTCTGAGACAGGTGCTGCA  
TGGCTGTCGTCAGCTCGTGTTGTGAAATGTTGGGTAAAGTCCCGCAACGAGC  
GCAACCCTTATCCTTTGTTGCCAGCGGTTTCGGCCGGGAACTCAAAGGAAACT  
GCCATTGATAA

**Table S3.** BLASTn sequence alignment results for *Citrobacter* sp. D2.

| Scientific name                  | Max Score | Total score | Percent Identity | Gaps (0%) | GeneBank accession |
|----------------------------------|-----------|-------------|------------------|-----------|--------------------|
| <i>Citrobacter freundii</i>      | 1993      | 15832       | 99.72%           |           | NZ_CP033744.1      |
| <i>Citrobacter portucalensis</i> | 1977      | 15727       | 99.45%           |           | NZ_CP044098.1      |

## 2. *Citrobacter* sp. S1

### Sequence (969 bp):

GCTGACGAGTGGCGGACGGGTGAGTAATGTCTGGGAAACTGCCCCGATGGAG  
GGGGATAACTACTGGAAACGGTAGCTAATACCGCATAATGTCGCAAGACCA  
AAGAGGGGGACCTTCGGGCCTCTTGCCATCGGATGTGCCCAGATGGGATTAG  
CTTGTTGGTGAGGTAACGGCTCACCAAGGCGACGATCCCTAGCTGGTCTGAG  
AGGATGACCAGCCACACTGGAAGTGAAGACACGGTCCAGACTCCTACGGGAG  
GCAGCAGTGGGGAATATTGCACAATGGGCGCAAGCCTGATGCAGCCATGCC  
GCGTGTATGAAGAAGGCCTTCGGGTTGTAAAGTACTTTCAGCGGGGAGGAA  
GGGGTTAAGGTTAATAACCTTAGCCATTGACGTTACCCGCAGAAGAAGCAC  
CGGCTAACTCCGTGCCAGCAGCCGCGGTAATACGGAGGGTGCAAGCGTTAA  
TCGGAATTACTGGGCGTAAAGCGCACGCAGGCGGTCTGTCAAGTCGGATGTG  
AAATCCCCGGGCTCAACCTGGGAAGTGCATTTCGAAACTGGCAGGCTTGAGTC  
TCGTAGAGGGGGGTAGAATTCCAGGTGTAGCGGTGAAATGCGTAGAGATCT  
GGAGGAATACCGGTGGCGAAGGCGGCCCCCTGGACGAAGACTGACGCTCAG  
GTGCGAAAGCGTGGGGAGCAAACAGGATTAGATACCCTGGTAGTCCACGCC  
GTAAACGATGTCTATTTGGAGGTTGTGCCCTTGAGGTGTGGCTTCCGGAGCTA  
ACGCGTTAAATAGACCGCCTGGGGAGTACGGCCGCAAGGTAAAACTCAA  
TGAATTGACGGGGGGCCCGCACAAGCGGTGGAGCATGTGGTTTAATTTCGATGC  
AACGCGAAGAACCTTACCTGGTCTTGACATCCACAGAACTTGGCAGAAATG  
CCTTGGTGCCTTCGGGAACTGTGAGACAGGTGCTGCATGGCTGTC

**Table S4.** BLASTn sequence alignment results for *Citrobacter* sp. S1.

| Scientific name                 | Max Score | Total score | Percent Identity | Gaps          | GeneBank accession |
|---------------------------------|-----------|-------------|------------------|---------------|--------------------|
| <i>Citrobacter amalonaticus</i> | 1773      | 12417       | 99.69%           | 1/970<br>(0%) | NZ_LT556085.1      |
| <i>Citrobacter farmeri</i>      | 1768      | 1768        | 99.59%           | 1/970<br>(0%) | NZ_BBMX01000029.1  |

### 3. *Halomonas* sp. Hal-CG

#### Sequence:

GCGGCGGACGGGTGAGTAATGCATAGGAATCTGCCCCGGTAGTGGGGGATAA  
CCTGGGGAAACCCAGGCTAATACCGCATAACGTCCTACGGGAGAAAGGGGGC  
TTCGGCTCCCGCTATTGGATGAGCCTATGTCGGATTAGCTAGTTGGTGAGGTA  
ACGGCTCACCAAGGCGACGATCCGTAGCTGGTCTGAGAGGATGATCAGCCA  
CATCGGGACTGAGACACGGCCCCGAACCTCCTACGGGAGGCAGCAGTGGGGAA  
TATTGGACAATGGGGGCAACCCTGATCCAGCCATGCCGCGTGTGTGAAGAA  
GGCCCTCGGGTTGTAAAGCACTTTCAGCGAGGAAGAACGCCTAGTGGTTAAT  
ACCCATTAGGAAAGACATCACTCGCAGAAGAAGCACCGGCTAACTCCGTGC  
CAGCAGCCGCGGTAAATACGGAGGGTGCAAGCGTTAATCGGAATTACTGGGC  
GTAAAGCGCGCGTAGGTGGCTTGATAAGCCGGTTGTGAAAGCCCCGGGCTC  
AACCTGGGAACGGCATCCGGAACCTGTCAGGCTAGAGTGCAGGAGAGGAAG  
GTAGAATTCCCGGTGTAGCGGTGAAATGCGTAGAGATCGGGAGGAATACCA  
GTGGCGAAGGCGGCCTTCTGGACTGACACTGACACTGAGGTGCGAAAGCGT  
GGGTAGCAAACAGGATTAGATAACCCTGGTAGTCCACGCCGTAAACGATGTC  
GACCAGCCGTTGGGTGCCTAGAGCACTTTGTGGCGAAGTTAACGCGATAAGT  
CGACCGCCTGGGGAGTACGGCCGCAAGGTTAAAACTCAAATGAATTGACGG  
GGGCCCCGCACAAGCGGTGGAGCATGTGGTTTAATTTCGATGCAACGCGAAGA  
ACCTTACCTACCCTTGACATCTACAGAAGCCGGAAGAGATTCTGGTGTGCCT  
TCGGGAACTGTAAGACAGGTGCTGCATGGCTGTCGTCAGCTCGTGTTGTGAA  
ATGTTG GGTAAAGTCCCGTAACGAGCGCAA

**Table S5.** BLASTn sequence alignments results *Halomonas* sp. Hal-CG.

| Scientific name              | Max Score | Total score | Percent Identity | Gaps (%)    | GeneBank accession |
|------------------------------|-----------|-------------|------------------|-------------|--------------------|
| <i>Halomonas boliviensis</i> | 1709      | 1709        | 99.70%           | 0/1004 (0%) | NZ_NPEY01000013.1  |
| <i>Halomonas titanicae</i>   | 1816      | 10876       | 99.30%           | 0/1004 (0%) | NZ_CP059082.1      |

#### 4. *Exiguobacterium* sp. Ex-Ind2

##### Sequence (785 bp):

CGTCACCTTGAGATGGCCTTGCGGTGCATTAGCTAGTTGGTGGGGTAACGGC  
CCACCAAGGCGACGATGCATAGCCGACCTGAGAGGGTGATCGGCCACACTG  
GGACTGAGACACGGCCCAGACTCCTACGGGAGGCAGCAGTAGGGAATCTTC  
CACAATGGACGAAAGTCTGATGGAGCAACGCCGCGTGAGTGATGAAGGTTT  
TCGGATCGTAAAACTCTGTTGTAAGGGAAGAACACGTACGAGAGGAAATGC  
TCGTACCTTGACGGTACCTTACGAGAAAGCCACGGCTAACTACGTGCCAGCA  
GCCGCGGTAAATACGTAGGTGGCAAGCGTTGTCCGGAATTATTGGGCGTAAAG  
CGCGCGCAGGCGGCCTTTTAGTCTGATGTGAAAGCCCCCGGCTCAACCGGGG  
AGGGCCATTGGAACTGGAAGGCTTGAGTACAGAAGAGAAGAGTGGAATTC  
CACGTGTAGCGGTGAAATGCGTAGAGATGTGGAGGAACACCAGTGGCGAAG  
GCGACTCTTTGGTCTGTAAGTACGCTGAGGCGCGAAAGCGTGGGGAGCAA  
ACAGGATTAGATACCCTGGTAGTCCACGCCGTAACTCGATGAGTGCTAGGT  
GTTGGGGGGTTTCCGCCCCTCAGTGCTGCAGCTAACGCATTAAGCACTCCGC  
CTGGGGAGTACGCGCCGCAAGGCTGAAACTCAAAGCGCTTGAGAGATCAAG  
TTTTCCCTTCGGGGACAATGGTGACAGGTGGTGCATGGTTGTCGTCAGCTCGT  
GTCGTGAGATG

**Table S6.** BLASTn sequence alignment results for *Halomonas* sp. Hal-CG.

| Scientific name                   | Max Score | Total score | Percent Identity | Gaps (%)   | GeneBank accession |
|-----------------------------------|-----------|-------------|------------------|------------|--------------------|
| <i>Exiguobacterium indicum</i>    | 1271      | 1420        | 99.29%           | 3/705 (0%) | NZ_MPSZ01000021.1  |
| <i>Exiguobacterium acetilicum</i> | 1271      | 12730       | 99.29%           | 3/705 (0%) | NZ_JNIR01000001.1  |

#### **D. References:**

42. Saitou N. and Nei M. (1987). The neighbor-joining method: A new method for reconstructing phylogenetic trees. *Molecular Biology and Evolution* 4:406-425.
43. Felsenstein J. (1985). Confidence limits on phylogenies: An approach using the bootstrap. *Evolution* 39:783-791.

44. Tamura K., Nei M., and Kumar S. (2004). Prospects for inferring very large phylogenies by using the neighbor-joining method. *Proceedings of the National Academy of Sciences (USA)* 101:11030-11035.
45. Tamura K., Stecher G., and Kumar S. (2021). MEGA 11: Molecular Evolutionary Genetics Analysis Version 11. *Molecular Biology and Evolution*  
<https://doi.org/10.1093/molbev/msab120>.
